# Supplementary material for: FeS2crystal lattice promotes the nanostructure and enhances the electrocatalytic performance of WS2nanosheets for the oxygen evolution reaction
Source: Royal Society of Chemistry journal article supplement (doi:10.1039/d0dt01660h), 2020-01-01
Supplement: d0dt01660h1.pdf [file d0dt01660h1.pdf]

# FeS<sub>2</sub> Crystal Lattice Promotes Nanostructure and Enhances Electrocatalytic Performance of WS<sub>2</sub> Nanosheet for Oxygen Evolution Reaction

Guoteng Zhang,<sup>a</sup> Zaitao Hao<sup>a</sup>, Jie Yin,<sup>\*,a</sup> Chen Wang,<sup>a</sup> Jinghao Zhang,<sup>a</sup> Zhiyu Zhao,<sup>a</sup> Denghu Wei,<sup>a</sup> Huawei Zhou,<sup>\*,a</sup> and Zhongcheng Li<sup>\*,b</sup>

<sup>a</sup>College of Materials Science and Engineering; School of Chemistry and Chemical Engineering; Shandong Provincial Key Laboratory/Collaborative Innovation Center of Chemical Energy Storage; Liaocheng University

<sup>b</sup>Key Laboratory of Optic-electric Sensing and Analytical Chemistry for Life Science, MOE, College of Chemistry and Molecular Engineering, Qingdao University of Science and Technology

\* Email: [yinjieiy@163.com](mailto:yinjieiy@163.com); [zhouhuaweiopv@163.com](mailto:zhouhuaweiopv@163.com); [zhongchengli@qust.edu.cn](mailto:zhongchengli@qust.edu.cn)

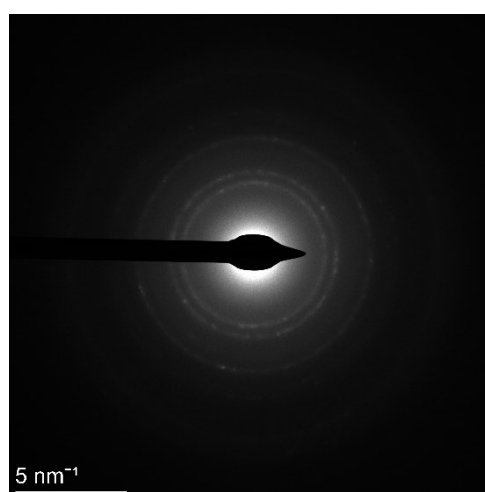

Figure S1 The selected area electron diffraction pattern of the FeS<sub>2</sub> CL@WS<sub>2</sub> NS composite

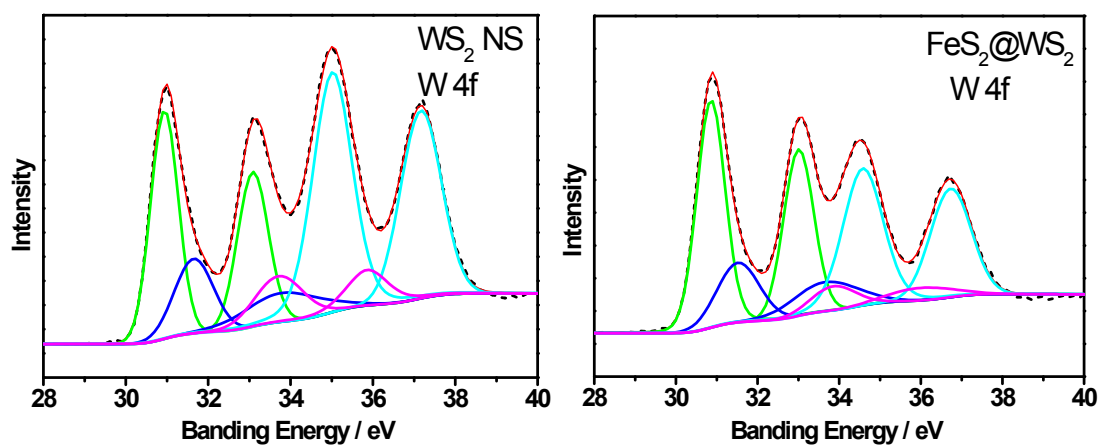

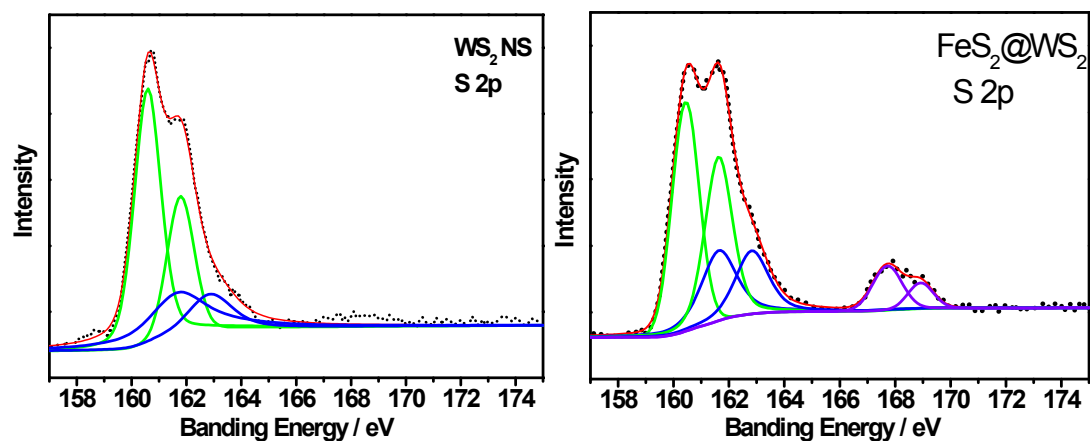

Figure S2. XPS fitting spectra of W 4f, S 2p in the WS<sub>2</sub> and FeS<sub>2</sub>@WS<sub>2</sub> heterogeneous catalyst

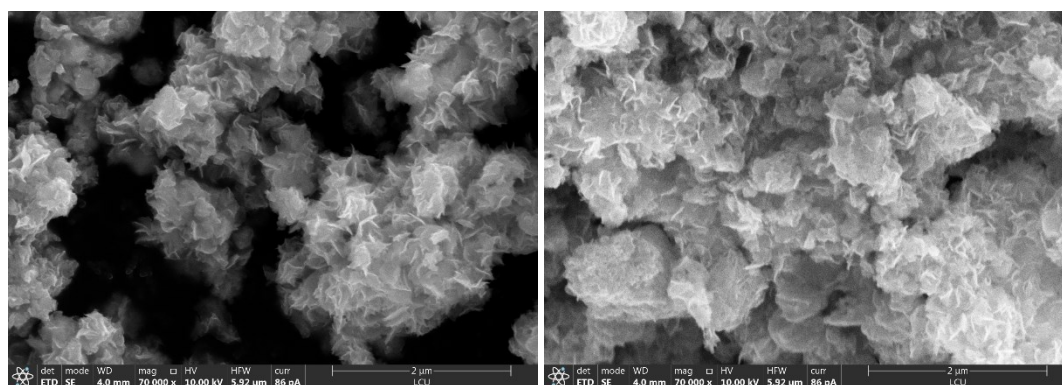

Figure S3 (a) The SEM of FeS<sub>2</sub> CL@WS<sub>2</sub> NS, (b) The SEM of FeS<sub>2</sub> CL@WS<sub>2</sub> NS after durability measurement

Table S1 XPS fitting data of W 4f, S 2p in the WS<sub>2</sub> and FeS<sub>2</sub>/WS<sub>2</sub> heterogeneous catalyst

| sample | Species         | Electron type | Banding Energy | Content (%) |
|--------|-----------------|---------------|----------------|-------------|
|        | W <sup>2+</sup> | 4f7/2         | 30.936         | 29.16%      |
|        |                 | 4f5/2         | 33.086         |             |
|        | W <sup>4+</sup> | 4f7/2         | 31.653         | 13.37%      |

|                 |                                   |                 |                 |         |         |        |
|-----------------|-----------------------------------|-----------------|-----------------|---------|---------|--------|
|                 |                                   | W <sup>4+</sup> | 4f5/2           | 33.803  | 10.38%  |        |
|                 |                                   |                 | 4f7/2           | 33.715  |         |        |
|                 |                                   | W <sup>6+</sup> | 4f5/2           | 35.865  | 47.09%  |        |
|                 |                                   |                 | 4f7/2           | 35.018  |         |        |
|                 |                                   | S               | S <sup>2-</sup> | 4f5/2   | 37.168  | 51.10% |
|                 |                                   |                 |                 | 2p3/2   | 161.781 |        |
|                 | S                                 |                 | 2p1/2           | 160.581 | 48.90%  |        |
|                 |                                   |                 | 2p3/2           | 161.670 |         |        |
|                 | FeS <sub>2</sub> @WS <sub>2</sub> | W               | W <sup>2+</sup> | 4f7/2   | 30.866  | 44.04% |
|                 |                                   |                 |                 | 4f5/2   | 33.016  |        |
| W <sup>4+</sup> |                                   |                 | 4f7/2           | 31.609  | 13.33%  |        |
|                 |                                   |                 | 4f5/2           | 33.753  |         |        |
| W <sup>4+</sup> |                                   |                 | 4f7/2           | 33.908  | 4.90%   |        |
|                 |                                   |                 | 4f5/2           | 36.058  |         |        |
| W <sup>5+</sup> |                                   |                 | 4f7/2           | 34.571  | 37.73%  |        |
|                 |                                   |                 | 4f5/2           | 36.721  |         |        |
| S <sup>2-</sup> |                                   |                 | 2p3/2           | 160.435 | 49.18%  |        |
|                 |                                   |                 | 2p1/2           | 161.635 |         |        |

|  |  |                 |       |         |        |
|--|--|-----------------|-------|---------|--------|
|  |  | S               | 2p3/2 | 161.627 | 40.35% |
|  |  |                 | 2p1/2 | 162.827 |        |
|  |  | S <sup>6+</sup> | 2p3/2 | 167.720 | 10.47% |
|  |  |                 | 2p1/2 | 168.920 |        |

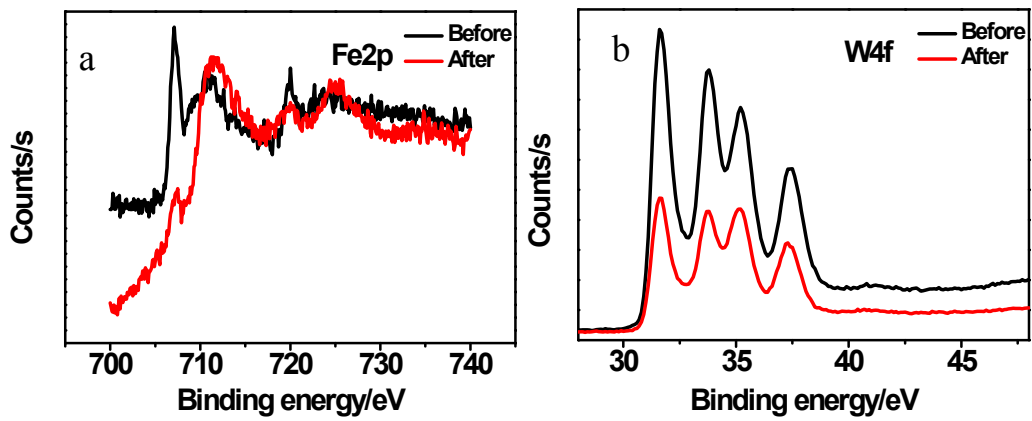

Figure S4 (a) The Fe2p curves of FeS<sub>2</sub> CL@WS<sub>2</sub> NS before and after durability measurement, (b) The W4f curves of FeS<sub>2</sub> CL@WS<sub>2</sub> NS after durability measurement

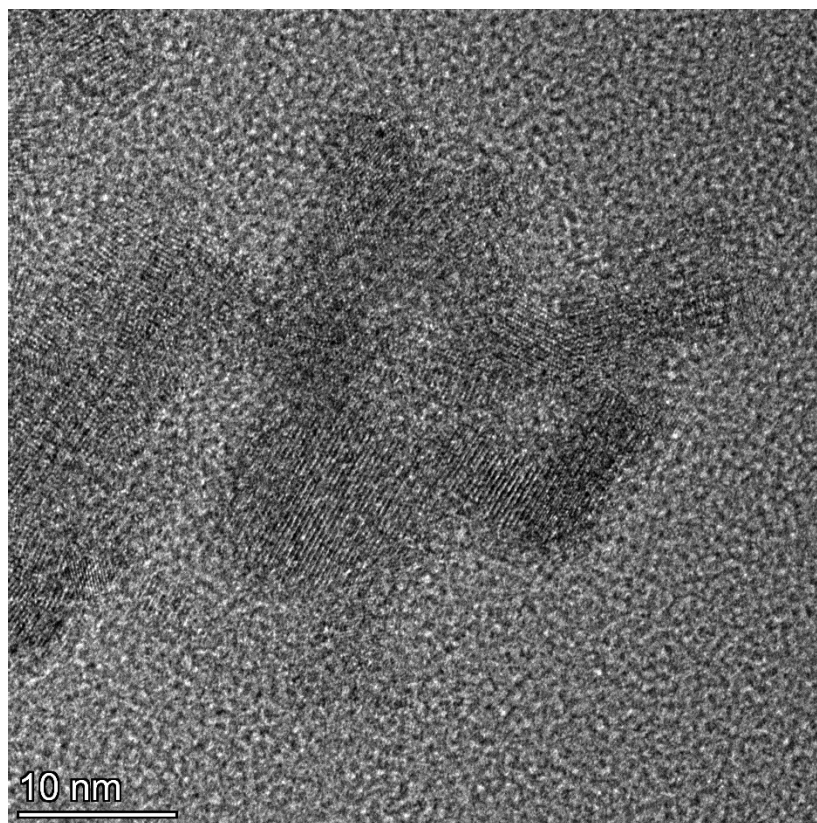

Figure S5 The HRTEM of FeS<sub>2</sub> CL@WS<sub>2</sub> NS after durability measurement
